# Supplementary material for: Hybrid Immunity from Gam-COVID-Vac Vaccination and Natural SARS-CoV-2 Infection Confers Broader Neutralizing Activity against Omicron Lineage VOCs Than Revaccination or Reinfection
Source: MDPI journal article supplement (doi:10.3390/vaccines12010055), 2024-01-06
Supplement: s1 [file s1]

Table S1 – Antibody titer analysis for Re-Vaccinated (RV) donors

| No | IgM,<br>CP | IgA,<br>CP | IgG,<br>BAU/<br>ml | Ncc,<br>IgG,<br>CP | Date of<br>Vaccina-<br>tion | Date of<br>Re-<br>Vaccina-<br>tion | Date of<br>Blood<br>Sampling | Days<br>between<br>Vac.<br>and<br>Re-Vac. | Days<br>before<br>Blood<br>Sam-<br>pling |
|----|------------|------------|--------------------|--------------------|-----------------------------|------------------------------------|------------------------------|-------------------------------------------|------------------------------------------|
| 2  | 0.1        | 0.1        | 28.3               | 0.2                | 02.21                       | 08.21                              | 08.10.21                     | 180                                       | 60                                       |
| 3  | 0.3        | 6.8        | 1023               | 0.2                | 21.04.21                    | 27.10.21                           | 19.11.21                     | 185                                       | 21                                       |
| 4  | 0.2        | 4.5        | 1022               | 0.4                | 02.03.21                    | 16.08.21                           | 19.11.21                     | 165                                       | 93                                       |
| 5  | 0.2        | 0.1        | 86                 | 0.3                | 29.04.21                    | 16.08.21                           | 18.11.21                     | 102                                       | 92                                       |
| 6  | 0.1        | 0.3        | 188.2              | 0.2                | 05.04.21                    | 07.10.21                           | 18.11.21                     | 182                                       | 41                                       |
| 7  | 0.1        | 1.2        | 264.4              | 0.2                | xx.12.20                    | xx.07.21                           | 08.10.21                     | 210                                       | 90                                       |
| 8  | 0.8        | 1.7        | 857                | 0.6                | 15.03.21                    | 17.09.21                           | 18.11.21                     | 182                                       | 61                                       |
| 9  | 0.2        | 2.6        | 1022               | 0.3                | 26.03.21                    | 09.2021                            | 30.11.21                     | 170                                       | 60                                       |
| 14 | 0.2        | 0.8        | 75                 | 0.2                | 15.04.21                    | 27.09.21                           | 23.11.21                     | 162                                       | 56                                       |
| 15 | 0.1        | 1.5        | 181                | 0.2                | 01.03.21                    | 01.09.21                           | 23.11.21                     | 180                                       | 82                                       |
| 16 | 0.1        | 0.3        | 99                 | 0.2                | 01.03.21                    | 01.09.21                           | 23.11.21                     | 180                                       | 82                                       |
| 17 | 0.1        | 3.0        | 50                 | 0.3                | 09.04.21                    | 18.10.21                           | 23.11.21                     | 188                                       | 35                                       |
| 18 | 1.4        | 0.5        | 1696               | 0.2                | 03.03.21                    | 06.09.21                           | 23.11.21                     | 183                                       | 77                                       |
| 19 | 0.1        | 1.1        | 440                | 0.2                | 01.02.21                    | 06.08.21                           | 23.11.21                     | 185                                       | 105                                      |
| 21 | 0.2        | 0.5        | 2085               | 0.6                | 03.03.21                    | 06.09.21                           | 24.11.21                     | 185                                       | 78                                       |

CP – coefficient of positivity; BAU – binding antibody units; Ncc – nucleocapsid protein of SARS-CoV-2

Table S2 – Antibody titer analysis for Re-Infected (RI) donors

| No | IgM,<br>CP | IgA,<br>CP | IgG,<br>BAU/<br>ml | Ncc,<br>IgG,<br>CP | Date of<br>PCR1+<br><br>Patient's<br>Condition | Date of<br>PCR2+<br><br>Patient's<br>Condition | Date of<br>Blood<br>Sampling | Days<br>between<br>PCR1+<br>and<br>PCR2+ | Days<br>before<br>Blood<br>Sam-<br>pling |
|----|------------|------------|--------------------|--------------------|------------------------------------------------|------------------------------------------------|------------------------------|------------------------------------------|------------------------------------------|
| 23 | 0.6        | 1.7        | 441                | 16.8               | 21.06.21<br>Severe                             | 13.10.21<br>Mild                               | 23.11.21                     | 114                                      | 40                                       |
| 24 | 0.0        | 5.1        | 409                | 5.9                | 07.10.20<br>Moderate                           | 12.07.21<br>Moderate                           | 23.11.21                     | 280                                      | 131                                      |
| 25 | 17.7       | 2.5        | 470                | 17.6               | 22.10.20<br>Mild                               | 25.10.21<br>Mild                               | 25.11.21                     | 368                                      | 30                                       |
| 26 | 0.1        | 5.3        | 1072               | 2.4                | 11.09.20<br>Moderate                           | -<br>Mild                                      | 18.11.21                     | -                                        | -                                        |
| 27 | 1.1        | 9.9        | 342                | 1.7                | 04.11.20<br>Moderate                           | -<br>Mild                                      | 18.11.21                     | -                                        | -                                        |
| 28 | 0.3        | 1.9        | 98                 | 8.3                | 16.11.20<br>Mild                               | 30.08.21<br>AS                                 | 18.11.21                     | 290                                      | 79                                       |
| 30 | 0.6        | 9.6        | 263.1              | 17.7               | 20.06.20<br>Moderate                           | 18.10.21<br>Moderate                           |                              | 430                                      | ?                                        |
| 33 | 0.4        | 4.0        | 753                | 3.0                | 02.2020<br>N/A                                 | 02.2021<br>N/A                                 | 18.11.21                     | 360                                      | 280                                      |
| 34 | 0.4        | 8.7        | 112                | 1.3                | 04.03.21<br>Moderate                           | 28.06.21<br>Mild                               | 25.11.21                     | 114                                      | 150                                      |
| 35 | 0.1        | 1.0        | 57.8               | 1.2                | 13.10.20<br>Moderate                           | 21.06.21<br>Mild                               | 16.11.21                     | 250                                      | 147                                      |
| 36 | 0.5        | 4.9        | 486                | 4.6                | 01.10.20<br>Moderate                           | -<br>AS                                        | 18.11.21                     | -                                        | -                                        |
| 37 | 0.6        | 15.9       | 710                | 17.3               | 07.10.20<br>Moderate                           | 12.07.21<br>AS                                 | 17.11.21                     | 280                                      | 125                                      |
| 38 | 4.6        | 0.4        | 10                 | 0.3                | 17.08.20<br>Mild                               | 26.10.21<br>AS                                 | 23.11.21                     | 430                                      | 27                                       |
| 82 | 7.4        | 16.8       | 2813               | 17.7               | 19.10.20<br>Moderate                           | 29.10.21<br>AS                                 | 17.11.21                     | 375                                      | 22                                       |

CP – coefficient of positivity; BAU – binding antibody units; Ncc – nucleocapsid protein of SARS-CoV-2; AS – asymptomatic; N/A – not available

Table S3 – Antibody titer analysis for Breakthrough Infected (BI) donors

| No | IgM,<br>CP | IgA,<br>CP | IgG,<br>BAU/<br>ml | Ncc,<br>IgG,<br>CP | Date of<br>Vaccina-<br>tion | Date of<br>PCR+ | Date of<br>Blood<br>Sampling | Days<br>between<br>Vac.<br>and<br>PCR+ | Days<br>before<br>Blood<br>Sam-<br>pling |
|----|------------|------------|--------------------|--------------------|-----------------------------|-----------------|------------------------------|----------------------------------------|------------------------------------------|
| 39 | 0.6        | 2.7        | 2123               | 17.7               | 20.07.21                    | 13.09.21        | 18.11.21                     | 53                                     | 65                                       |
| 40 | 0.7        | 11.7       | 4564               | 17.8               | 16.08.21                    | 25.10.21        | 18.11.21                     | 70                                     | 23                                       |
| 42 | 1.2        | 6.7        | 4220               | 4.8                | 15.05.21                    | 11.10.21        | 25.11.21                     | 68                                     | 45                                       |
| 43 | 0.6        | 0.8        | 202                | 0.8                | 09.06.21                    | 30.06.21        | 23.11.21                     | 140                                    | 143                                      |
| 44 | 0.4        | 8.9        | 475                | 13.8               | 10.06.21                    | 05.07.21        | 18.11.21                     | 25                                     | 132                                      |
| 45 | 2.0        | 15.2       | 4094               | 17.2               | 02.2021                     | xx.11. 21       | -                            | -                                      | -                                        |
| 46 | 0.7        | 11.1       | 4985               | 17.2               | 26.02.21                    | 18.10.21        | 17.11.21                     | 235                                    | 30                                       |
| 47 | 0.2        | 0.5        | 485                | 2.2                | 21.04.21                    | 17.06.21        | 17.11.21                     | 56                                     | 150                                      |
| 48 | 1.1        | 6.0        | 16498              | 17.7               | 05.05.21                    | 04.10.21        | 17.11.21                     | 150                                    | 43                                       |
| 49 | 0.3        | 6.5        | 9450               | 4.1                | 21.04.21                    | 25.10.21        | 17.11.21                     | 184                                    | 22                                       |
| 50 | 0.5        | 6.0        | 2498               | 17.3               | 26.07.21                    | 24.09.21        | 24.11.21                     | 58                                     | 60                                       |
| 51 | 0.2        | 0.9        | 368                | 1.9                | 19.05.21                    | 02.08.21        | 23.11.21                     | 73                                     | 111                                      |
| 52 | 0.2        | 17.3       | 1182               | 16.4               | 09.03.21                    | 20.07.21        | 24.11.21                     | 131                                    | 124                                      |
| 53 | 0.5        | 9.0        | 1413               | 17.3               | 21.07.21                    | 20.09.21        | 24.11.21                     | 59                                     | 64                                       |
| 54 | 1.1        | 18.4       | 4989               | 16.7               | 22.03.21                    | 01.11.21        | 24.11.21                     | 230                                    | 23                                       |
| 55 | 4.5        | 11.3       | 4695               | 17.2               | 13.05.21                    | 03.11.21        | 24.11.21                     | 170                                    | 21                                       |
| 56 | 0.3        | 2.2        | 969                | 7.2                | 04.06.21                    | 31.07.21        | 24.11.21                     | 113                                    | 112                                      |
| 57 | 0.1        | 2.8        | 1028               | 9.0                | 21.07.21                    | 30.08.21        | 24.11.21                     | 39                                     | 84                                       |
| 58 | 0.3        | 3.1        | 1675               | 15.5               | 01.05.21                    | 01.10.21        | 24.11.21                     | 150                                    | 54                                       |
| 59 | 3.1        | 18.4       | 50890              | 17.7               | 05.05.21                    | 20.10.21        | 24.11.21                     | 165                                    | 34                                       |
| 60 | 0.4        | 4.6        | 3085               | 17.7               | 05.05.21                    | 01.10.21        | 24.11.21                     | 145                                    | 54                                       |
| 61 | 0.4        | 1.2        | 1753               | 7.1                | 13.07.21                    | 06.08.21        | 19.11.21                     | 23                                     | 103                                      |
| 84 | 0.2        | 3.2        | 1231               | 5.9                | 21.04.21                    | 07.07.21        | 17.11.21                     | 76                                     | 130                                      |
| 85 | 0.2        | 11.2       | 772                | 1.6                | 11.06.21                    | 02.08.21        | 24.11.21                     | 51                                     | 112                                      |

CP – coefficient of positivity; BAU – binding antibody units; Ncc – nucleocapsid protein of SARS-CoV-2

Table S4 – Antibody titer analysis for Vaccinated Convalescent (VC) donors

| №  | IgM,<br>CP | IgA,<br>CP | IgG,<br>BAU/<br>ml | Ncc,<br>IgG,<br>CP | Date of<br>PCR+       | Date of<br>Vaccina-<br>tion | Date of<br>Blood<br>Sampling | Days<br>between<br>PCR+<br>and<br>Vac. | Days<br>before<br>Blood<br>Sam-<br>pling |
|----|------------|------------|--------------------|--------------------|-----------------------|-----------------------------|------------------------------|----------------------------------------|------------------------------------------|
| 62 | 1.9        | 0.6        | 1418               | 13.3               | 16.09.20              | 16.08.21                    | 18.11.21                     | 330                                    | 92                                       |
| 63 | 0.3        | 4.1        | 8608               | 13.7               | 16.11.20              | 27.09.21                    | 18.11.21                     | 314                                    | 51                                       |
| 64 | 3.2        | 18.0       | 14129              | 14.6               | 10.11.20              | 06.09.21                    | 18.11.21                     | 296                                    | 72                                       |
| 65 | 0.6        | 16.9       | 2850               | 3.3                | 26.10.20              | 16.08.21                    | 18.11.21                     | 300                                    | 92                                       |
| 67 | 0.1        | 6.1        | 4434               | 1.7                | 21.10.20              | 21.09.20                    | 18.11.21                     | 330                                    | 57                                       |
| 68 | 1.1        | 16.6       | 4569               | 1.7                | 14.05.20              | xx.07.21                    | 10.09.21                     | 420                                    | 60                                       |
| 69 | 1.0        | 10.4       | 3042               | 3.0                | 30.10.20              | 16.08.21                    | 18.11.21                     | 286                                    | 92                                       |
| 70 | 0.6        | 9.2        | 474                | 1.1                | 04.11.20,<br>30.06.21 | 17.07.21                    | 18.11.21                     | 253                                    | 121                                      |
| 72 | 0.7        | 7.8        | 1190               | 5.9                | xx.10.20              | xx.06.21                    | 17.11.21                     | 240                                    | 150                                      |
| 83 | 1.3        | 1.7        | 827                | 3.9                | 26.10.20              | 17.07.21                    | 18.11.21                     | 251                                    | 121                                      |
| 75 | 0.4        | 12.0       | 733                | 0.7                | 11.09.20              | 16.08.21                    | 18.11.21                     | 335                                    | 92                                       |
| 76 | 1.3        | 5.0        | 731                | 0.4                | 10.09.20              | 16.08.21                    | 18.11.21                     | 336                                    | 92                                       |
| 80 | 0.4        | 8.9        | 2657               | 13.7               | 17.06.21              | 18.10.21                    | 24.11.21                     | 121                                    | 35                                       |
| 81 | 0.5        | 3.8        | 1087               | 0.8                | 18.11.20              | 06.09.21                    | 24.11.21                     | 288                                    | 78                                       |

CP – coefficient of positivity; BAU – binding antibody units; Ncc – nucleocapsid protein of SARS-CoV-2

Table S5 – Neutralization of virus variants by Re-Vaccinated (RV) donor sera (GMT ID50)

| №  | Wu-1 | BA.1 | BA.4/5 |
|----|------|------|--------|
| 2  | 11   | 10   | 10     |
| 3  | 396  | 84   | 54     |
| 4  | 864  | 77   | 107    |
| 5  | 50   | 10   | 10     |
| 6  | 146  | 11   | 10     |
| 7  | 17   | 10   | 10     |
| 8  | 807  | 43   | 10     |
| 9  | 1582 | 84   | 33     |
| 14 | 53   | 10   | 10     |
| 15 | 42   | 10   | 10     |
| 16 | 105  | 10   | 10     |
| 17 | 232  | 168  | 15     |
| 18 | 899  | 122  | 37     |
| 19 | 387  | 52   | 13     |
| 21 | 2058 | 159  | 41     |

Table S6 – Neutralization of virus variants by Re-Infected (RI) donor sera (GMT ID50)

| №  | Wu-1 | BA.1 | BA.4/5 |
|----|------|------|--------|
| 23 | 205  | 24   | 24     |
| 24 | 515  | 74   | 116    |
| 25 | 901  | 9    | 16     |
| 26 | 154  | 46   | 19     |
| 27 | 247  | 45   | 40     |
| 28 | 94   | 38   | 26     |
| 30 | 535  | 35   | 111    |
| 33 | 338  | 95   | 11     |
| 34 | 85   | 9    | 10     |
| 35 | 115  | 52   | 68     |
| 36 | 928  | 72   | 71     |
| 37 | 1936 | 15   | 76     |
| 82 | 2135 | 76   | 236    |

Table S7 – Neutralization of virus variants by Breakthrough Infected (BI) donor sera (GMT ID50)

| №  | Wu-1  | BA1   | BA.4/5 |
|----|-------|-------|--------|
| 39 | 15398 | 107   | 96     |
| 40 | 5770  | 169   | 167    |
| 42 | 4531  | 280   | 671    |
| 43 | 53    | 10    | 10     |
| 44 | 209   | 44    | 33     |
| 45 | 3138  | 246   | 670    |
| 46 | 3161  | 320   | 562    |
| 47 | 658   | 61    | 37     |
| 48 | 10536 | 352   | 1440   |
| 49 | 8165  | 968   | 744    |
| 50 | 1346  | 126   | 152    |
| 53 | 1469  | 129   | 30     |
| 54 | 6834  | 1106  | 542    |
| 55 | 4079  | 589   | 690    |
| 56 | 875   | 242   | 61     |
| 57 | 1163  | 22    | 28     |
| 58 | 3476  | 174   | 288    |
| 59 | 72083 | 27370 | 32159  |
| 60 | 2215  | 504   | 172    |
| 61 | 776   | 55    | 10     |
| 84 | 44172 | ND    | 1751   |
| 85 | 10380 | 45    | 206    |

Table S8 – Neutralization of virus variants by Vaccinated Convalescents (VC) donor sera (GMT ID50)

| №  | Wu-1  | BA.1 | BA.4/5 |
|----|-------|------|--------|
| 62 | 1704  | 195  | 55     |
| 63 | 3915  | 2801 | 1679   |
| 64 | 6439  | 2120 | 1282   |
| 65 | 982   | 832  | 232    |
| 67 | 1351  | 1007 | 610    |
| 68 | 2231  | 699  | 541    |
| 69 | 1420  | 498  | 638    |
| 70 | 1917  | 488  | 143    |
| 72 | 10267 | 431  | 396    |
| 83 | 4405  | 66   | 57     |
| 75 | 770   | 279  | 108    |
| 76 | 1278  | 113  | 110    |
| 80 | 1731  | 286  | 109    |
| 81 | 14541 | 67   | 30     |
